# Supplementary material for: Tumor suppressor menin is required for subunit-specific nAChR α5 transcription and nAChR-dependent presynaptic facilitation in cultured mouse hippocampal neurons
Source: PubMed Central journal article supplement (PMC5432004; doi:10.1038/s41598-017-01825-x), 2017-05-11
Supplement: 41598_2017_1825_MOESM1_ESM.pdf [file 41598_2017_1825_MOESM1_ESM.pdf]

**SUPPLEMENTARY INFORMATION FOR**

Tumor suppressor menin is required for subunit-specific nAChR  $\alpha 5$  transcription and nAChR-dependent presynaptic facilitation in cultured mouse hippocampal neurons

**AUTHORS**

Angela M. Getz, Fenglian Xu, Frank Visser, Roger Persson, & Naweed I. Syed

**This File Contains:**

Supplementary Data:

Tables S1 to S9

Figures S1 to S7

Supplementary Experimental Procedures:

Tables S10 to S12

Supplementary References

**SUPPLEMENTARY DATA**Supplementary Table S1. Related to Figure 2. ICC fluorescence of menin in hippocampal neuron cultures.

| Treatment           | Menin (N) Nuclear Fluorescence $\pm$ SEM (AU) | $P^1$  | $n^3$ |
|---------------------|-----------------------------------------------|--------|-------|
| 0.1% DMSO           | 87.30 $\pm$ 2.72                              | 0.646  | 67    |
| 20 $\mu$ M PD150606 | 85.35 $\pm$ 2.80                              |        | 59    |
| Treatment           | Menin (C) Neurite Fluorescence $\pm$ SEM (AU) | $P^2$  | $n^4$ |
| 0.1% DMSO           | 55.72 $\pm$ 3.19                              | <0.001 | 27    |
| 20 $\mu$ M PD150606 | 38.86 $\pm$ 3.13                              |        | 27    |

1. Mann-Whitney U test (2-tailed)
2. Independent samples t-test (2-tailed)
3. n refers to the analysis of menin N-terminal epitope fluorescence intensity within neuronal nuclei (delineated by DAPI), each neuron in the image was analyzed, ROIs derived from 9 separate images from 3 independent experiments
4. n refers to the analysis of menin C-terminal epitope fluorescence intensity along a 25  $\mu$ M length of neurite (delineated by the neurofilament immunolabel), 3 neurites from 3 different neurons were analyzed per image, ROIs derived from 9 separate images from 3 independent experiments

Supplementary Table S2. Related to Figure 3. Incidence of C-menin colocalization in super-resolved ICC images.

| ICC Label     | Mean Number of Puncta $\pm$ SEM | % Colocalization with C-menin $\pm$ SEM | $P^1$  | $n^2$ |
|---------------|---------------------------------|-----------------------------------------|--------|-------|
| Synaptotagmin | 43.89 $\pm$ 5.72                | 61.02 $\pm$ 7.53                        | <0.001 | 9     |
| PSD-95        | 46.00 $\pm$ 3.55                | 29.11 $\pm$ 2.87                        | <0.001 | 10    |
| $\alpha$ -BTX | 45.79 $\pm$ 4.19                | 93.40 $\pm$ 2.01                        | -      | 19    |
| Menin (C)     | 41.94 $\pm$ 3.25                | -                                       | -      | 19    |

1. Kruskal-Wallis test (2-tailed), statistical significance ( $P$ ) relative to C-menin and  $\alpha$ -BTX colocalization
2. n refers to  $\geq 9$  separate images from  $\geq 2$  independent experiments

Supplementary Table S3. Related to Figure 4. Relative gene expression in lentivirus-transduced hippocampal neuron cultures.

| Treatment                | qPCR Target      | Fold-Change Expression <sup>1</sup> | SEM           | <i>P</i> <sup>2,3</sup> |
|--------------------------|------------------|-------------------------------------|---------------|-------------------------|
| Untreated Control<br>n=6 | <i>MEN1</i>      | 1                                   | 0.847 - 1.181 | -                       |
|                          | nAChR $\alpha$ 2 | 1                                   | 0.803 - 1.245 | -                       |
|                          | nAChR $\alpha$ 3 | 1                                   | 0.610 - 1.641 | -                       |
|                          | nAChR $\alpha$ 4 | 1                                   | 0.863 - 1.159 | -                       |
|                          | nAChR $\alpha$ 5 | 1                                   | 0.722 - 1.386 | -                       |
|                          | nAChR $\alpha$ 6 | ND <sup>4</sup>                     | -             | -                       |
|                          | nAChR $\alpha$ 7 | 1                                   | 0.781 - 1.280 | -                       |
|                          | nAChR $\beta$ 2  | 1                                   | 0.851 - 1.175 | -                       |
|                          | nAChR $\beta$ 3  | ND                                  | -             | -                       |
|                          | nAChR $\beta$ 4  | 1                                   | 0.377 - 2.650 | -                       |
|                          | GluR1            | 1                                   | 0.908 - 1.101 | -                       |
|                          | NR2A             | 1                                   | 0.847 - 1.181 | -                       |
|                          | Synaptophysin    | 1                                   | 0.863 - 1.158 | -                       |
| NTC shRNA<br>n=6         | <i>MEN1</i>      | 0.812                               | 0.649 - 1.179 | 0.195                   |
|                          | nAChR $\alpha$ 2 | 1.212                               | 0.925 - 1.609 | 0.148                   |
|                          | nAChR $\alpha$ 3 | 1.181                               | 0.683 - 1.907 | 0.394                   |
|                          | nAChR $\alpha$ 4 | 1.213                               | 0.955 - 1.463 | 0.059                   |
|                          | nAChR $\alpha$ 5 | 1.315                               | 0.935 - 1.831 | 0.098                   |
|                          | nAChR $\alpha$ 6 | ND                                  | -             | -                       |
|                          | nAChR $\alpha$ 7 | 1.002                               | 0.713 - 1.365 | 0.982                   |
|                          | nAChR $\beta$ 2  | 1.564                               | 1.117 - 2.340 | 0.014                   |
|                          | nAChR $\beta$ 3  | ND                                  | -             | -                       |
|                          | nAChR $\beta$ 4  | 0.795                               | 0.324 - 1.783 | 0.522                   |
|                          | GluR1            | 1.203                               | 1.010 - 1.496 | 0.061                   |
|                          | NR2A             | 0.651                               | 0.449 - 0.971 | 0.019                   |
|                          | Synaptophysin    | 1.174                               | 0.929 - 1.551 | 0.165                   |
| MEN1 shRNA<br>n=6        | <i>MEN1</i>      | 0.593                               | 0.430 - 0.933 | 0.009                   |
|                          | nAChR $\alpha$ 2 | 2.964                               | 2.200 - 3.910 | 0.001                   |
|                          | nAChR $\alpha$ 3 | 2.983                               | 1.661 - 5.317 | 0.001                   |
|                          | nAChR $\alpha$ 4 | 1.569                               | 1.059 - 2.198 | 0.019                   |
|                          | nAChR $\alpha$ 5 | 0.343                               | 0.256 - 0.446 | 0.002                   |
|                          | nAChR $\alpha$ 6 | ND                                  | -             | -                       |
|                          | nAChR $\alpha$ 7 | 2.196                               | 1.553 - 3.183 | 0.001                   |
|                          | nAChR $\beta$ 2  | 3.728                               | 2.762 - 5.242 | 0.001                   |
|                          | nAChR $\beta$ 3  | ND                                  | -             | -                       |
|                          | nAChR $\beta$ 4  | 1.392                               | 0.515 - 3.080 | 0.383                   |
|                          | GluR1            | 2.658                               | 2.184 - 3.274 | 0.001                   |
|                          | NR2A             | 3.729                               | 2.476 - 6.935 | <0.001                  |
|                          | Synaptophysin    | 2.727                               | 2.220 - 3.325 | 0.001                   |

1. Fold-change expression relative to untreated control
2. Pair wise fixed reallocation randomization test (REST-2009)<sup>1</sup>
3. Statistical significance (*P*) relative to untreated control
4. ND indicates the transcript was not detected in the qPCR reaction

Supplementary Table S4. Related to Figure 5. Mean somal ICC fluorescence values of menin and nAChRs in lentivirus-transduced hippocampal neuron cultures.

| Treatment       | DIV | Menin (C) ± SEM (AU) | <i>P</i> <sup>1</sup> | n <sup>2</sup> | Menin (N) ± SEM (AU) | <i>P</i> | n  |
|-----------------|-----|----------------------|-----------------------|----------------|----------------------|----------|----|
| NTC shRNA GFP+  | 3   | 59.64 ± 5.83         | 0.457                 | 28             | 71.66 ± 4.42         | 0.972    | 36 |
| NTC shRNA GFP-  |     | 55.31 ± 4.15         |                       | 42             | 71.85 ± 4.63         |          | 27 |
| NTC shRNA GFP+  | 7   | 76.03 ± 4.28         | 0.420                 | 33             | 71.76 ± 3.30         | 0.981    | 49 |
| NTC shRNA GFP-  |     | 72.28 ± 3.85         |                       | 38             | 71.95 ± 3.91         |          | 33 |
| NTC shRNA GFP+  | 10  | 56.91 ± 3.24         | 0.751                 | 29             | 96.67 ± 3.50         | 0.517    | 32 |
| NTC shRNA GFP-  |     | 58.20 ± 2.39         |                       | 34             | 100.68 ± 5.74        |          | 30 |
| NTC shRNA GFP+  | 14  | 52.93 ± 3.49         | 0.648                 | 25             | 98.58 ± 4.54         | 0.652    | 43 |
| NTC shRNA GFP-  |     | 52.48 ± 2.26         |                       | 30             | 97.59 ± 4.48         |          | 46 |
| Treatment       | DIV | nAChR α5 ± SEM (AU)  | <i>P</i>              | n              | α-BTX ± SEM (AU)     | <i>P</i> | n  |
| NTC shRNA GFP+  | 3   | 49.47 ± 3.77         | 0.417                 | 27             | 72.67 ± 4.54         | 0.588    | 45 |
| NTC shRNA GFP-  |     | 50.75 ± 6.70         |                       | 18             | 69.13 ± 4.61         |          | 52 |
| NTC shRNA GFP+  | 7   | 46.51 ± 2.31         | 0.634                 | 24             | 103.29 ± 5.72        | 0.521    | 53 |
| NTC shRNA GFP-  |     | 48.14 ± 2.41         |                       | 30             | 99.22 ± 4.81         |          | 54 |
| NTC shRNA GFP+  | 10  | 50.27 ± 2.07         | 0.898                 | 23             | 117.11 ± 5.00        | 0.978    | 48 |
| NTC shRNA GFP-  |     | 49.05 ± 2.11         |                       | 24             | 114.93 ± 5.35        |          | 51 |
| NTC shRNA GFP+  | 14  | 46.84 ± 2.76         | 0.689                 | 30             | 50.27 ± 2.07         | 0.682    | 23 |
| NTC shRNA GFP-  |     | 46.70 ± 2.27         |                       | 24             | 49.05 ± 2.11         |          | 24 |
| Treatment       | DIV | Menin (C) ± SEM (AU) | <i>P</i>              | n              | Menin (N) ± SEM (AU) | <i>P</i> | n  |
| MEN1 shRNA GFP+ | 3   | 40.12 ± 2.42         | <0.001                | 28             | 60.07 ± 2.88         | 0.004    | 54 |
| MEN1 shRNA GFP- |     | 64.16 ± 3.34         |                       | 37             | 74.58 ± 4.07         |          | 45 |
| MEN1 shRNA GFP+ | 7   | 43.85 ± 1.69         | <0.001                | 50             | 65.38 ± 2.72         | 0.001    | 58 |
| MEN1 shRNA GFP- |     | 60.56 ± 3.44         |                       | 26             | 79.71 ± 3.40         |          | 44 |
| MEN1 shRNA GFP+ | 10  | 53.02 ± 3.32         | 0.003                 | 24             | 83.77 ± 4.77         | 0.602    | 47 |
| MEN1 shRNA GFP- |     | 70.88 ± 4.89         |                       | 17             | 79.41 ± 5.65         |          | 27 |
| MEN1 shRNA GFP+ | 14  | 43.52 ± 3.23         | 0.006                 | 14             | 56.86 ± 3.96         | 0.473    | 35 |
| MEN1 shRNA GFP- |     | 62.60 ± 5.42         |                       | 13             | 55.31 ± 5.53         |          | 27 |
| Treatment       | DIV | nAChR α5 ± SEM (AU)  | <i>P</i>              | n              | α-BTX ± SEM (AU)     | <i>P</i> | n  |
| MEN1 shRNA GFP+ | 3   | 40.21 ± 3.76         | 0.984                 | 24             | 75.67 ± 4.26         | 0.024    | 54 |
| MEN1 shRNA GFP- |     | 42.20 ± 4.32         |                       | 25             | 90.06 ± 4.58         |          | 61 |
| MEN1 shRNA GFP+ | 7   | 41.10 ± 2.19         | <0.001                | 36             | 111.46 ± 3.17        | 0.456    | 86 |
| MEN1 shRNA GFP- |     | 57.63 ± 2.63         |                       | 29             | 115.31 ± 4.02        |          | 51 |
| MEN1 shRNA GFP+ | 10  | 42.35 ± 3.13         | 0.001                 | 18             | 96.56 ± 4.14         | 0.682    | 58 |
| MEN1 shRNA GFP- |     | 59.91 ± 3.32         |                       | 22             | 99.23 ± 4.85         |          | 36 |
| MEN1 shRNA GFP+ | 14  | 41.37 ± 2.72         | <0.001                | 12             | 97.30 ± 10.14        | 0.186    | 14 |
| MEN1 shRNA GFP- |     | 58.96 ± 2.90         |                       | 23             | 115.60 ± 8.71        |          | 13 |

1. Independent samples t-test or Mann-Whitney U test (2-tailed)
2. n refers to the analysis of fluorescence intensity within neuronal soma, ROIs derived from ≥4 separate images from ≥2 independent experiments, GFP+ and GFP- neurons were analyzed from the same images

Supplementary Table S5. Related to Figure 6. Mean neurite ICC fluorescence values of menin and nAChRs in lentivirus-transduced and calpain inhibitor-treated hippocampal neuron cultures.

| Treatment           | Menin (C) Neurite Fluorescence $\pm$ SEM (AU)     | $P^1$  | $n^2$ |
|---------------------|---------------------------------------------------|--------|-------|
| NTC shRNA           | 30.59 $\pm$ 1.07                                  | <0.001 | 51    |
| MEN1 shRNA          | 13.70 $\pm$ 0.93                                  |        | 52    |
| Treatment           | $\alpha$ -BTX Neurite Fluorescence $\pm$ SEM (AU) | $P$    | n     |
| NTC shRNA           | 26.14 $\pm$ 1.69                                  | 0.038  | 51    |
| MEN1 shRNA          | 20.08 $\pm$ 1.05                                  |        | 52    |
| 0.1% DMSO           | 29.03 $\pm$ 1.28                                  | <0.001 | 36    |
| 20 $\mu$ M PD150606 | 21.40 $\pm$ 0.85                                  |        | 36    |

1. Mann-Whitney U test (2-tailed)
2. n refers to the analysis of fluorescence intensity values along a 25  $\mu$ M length of neurite (delineated by GFP fluorescence or the neurofilament immunolabel), 2-3 neurites from different neurons were analyzed per image, ROIs derived from  $\geq 12$  separate images from  $\geq 2$  independent experiments

Supplementary Table S6. Related to Figure 7. Incidence of puncta colocalization in super-resolved ICC images from NTC shRNA- and MEN1 shRNA-transduced hippocampal neuron cultures.

| shRNA Treatment | Mean Number of Puncta $\pm$ SEM |        |       |                     |       |    |                         |       |    |
|-----------------|---------------------------------|--------|-------|---------------------|-------|----|-------------------------|-------|----|
|                 | C-menin                         | $P^1$  | $n^2$ | $\alpha$ -BTX       | $P$   | n  | SYT                     | $P$   | n  |
| NTC             | 57.37 $\pm$ 1.84                | <0.001 | 27    | 57.62 $\pm$ 2.62    | 0.002 | 26 | 40.65 $\pm$ 2.04        | 0.790 | 31 |
| MEN1            | 44.63 $\pm$ 2.79                |        | 24    | 46.08 $\pm$ 2.30    |       | 26 | 40.00 $\pm$ 1.30        |       | 30 |
| shRNA Treatment | % Colocalization $\pm$ SEM      |        |       |                     |       |    |                         |       |    |
|                 | SYT - C-menin                   | $P$    | n     | SYT - $\alpha$ -BTX | $P$   | n  | $\alpha$ -BTX - C-menin | $P$   | n  |
| NTC             | 55.63 $\pm$ 2.50                | <0.001 | 16    | 68.81 $\pm$ 3.03    | 0.033 | 15 | 96.17 $\pm$ 1.25        | 0.430 | 11 |
| MEN1            | 36.23 $\pm$ 1.97                |        | 14    | 59.01 $\pm$ 3.14    |       | 16 | 97.24 $\pm$ 1.24        |       | 10 |

1. Independent samples t-test or Mann-Whitney U test (2-tailed)
2. n refers to  $\geq 10$  separate images from  $\geq 2$  independent experiments

Supplementary Table S7. Related to Figure S5. mEPSC values in lentivirus-transduced hippocampal neuron cultures (all neuron samples).

| Treatment         | 10 $\mu$ M Nicotine | Mean Amplitude (pA) <sup>1</sup> | SEM (pA) | $P^2$              | $P^3$  | n  |
|-------------------|---------------------|----------------------------------|----------|--------------------|--------|----|
| Untreated Control | Pre                 | 33.09                            | 2.88     | (F=0.405; P=0.844) | 0.800  | 19 |
|                   | Post                | 32.55                            | 2.48     |                    |        |    |
| NTC shRNA         | Pre                 | 37.69                            | 2.86     | 0.912              | 0.259  | 15 |
|                   | Post                | 35.95                            | 2.60     | 0.988              |        |    |
| MEN1 shRNA        | Pre                 | 36.33                            | 3.99     | 0.976              | 0.717  | 17 |
|                   | Post                | 35.92                            | 3.89     | 0.987              |        |    |
| Treatment         | 10 $\mu$ M Nicotine | Mean Frequency (Hz) <sup>1</sup> | SEM (Hz) | $P$                | $P$    | n  |
| Untreated Control | Pre                 | 3.60                             | 0.58     | (F=1.373; P=0.241) | <0.001 | 19 |
|                   | Post                | 4.87                             | 0.67     |                    |        |    |
| NTC shRNA         | Pre                 | 3.66                             | 0.50     | 1.000              | <0.001 | 15 |
|                   | Post                | 4.86                             | 0.55     | 0.571              |        |    |
| MEN1 shRNA        | Pre                 | 3.74                             | 0.37     | 1.000              | 0.628  | 17 |
|                   | Post                | 3.61                             | 0.43     | 1.000              |        |    |

1. Data analysis was performed using MiniAnalysis software (Synptosoft Inc), which detects and measures the characteristics of mEPSCs when a ROI is selected. Traces were visually screened and synaptic events exhibiting a waveform appropriate for mEPSCs with a monophasic rise time to peak were selected for analyses. The total mean mEPSC rise and decay times was  $5.70 \pm 0.17$  and  $13.37 \pm 0.59$ , respectively, and did not vary amongst treatment groups or after nicotine application ( $P \geq 0.231$ , one-way ANOVA;  $P \geq 0.119$ , Kruskal-Wallis test). The total mean baseline noise was  $\pm 5.81$  pA.
2. One-way ANOVA, statistical significance ( $P$ ) relative to untreated control, pre-nicotine
3. Paired samples t-test (2-tailed)

Supplementary Table S8. Related to Figure S5 and Figure 8. Incidence of nicotine-induced facilitation in lentivirus-transduced hippocampal neuron cultures (all neuron samples).

| Treatment         | Relative mEPSC amplitude (Post/Pre-nicotine) $\pm$ SEM                            | $P^1$              |       |
|-------------------|-----------------------------------------------------------------------------------|--------------------|-------|
| Untreated Control | 1.03 $\pm$ 0.06                                                                   | (F=0.517; P=0.600) |       |
| NTC shRNA         | 0.96 $\pm$ 0.04                                                                   | 0.619              |       |
| MEN1 shRNA        | 1.00 $\pm$ 0.03                                                                   | 0.860              |       |
| Treatment         | Relative mEPSC frequency (Post/Pre-nicotine) $\pm$ SEM                            | $P^2$              |       |
| Untreated Control | 1.49 $\pm$ 0.12                                                                   | -                  |       |
| NTC shRNA         | 1.45 $\pm$ 0.12                                                                   | 0.784              |       |
| MEN1 shRNA        | 0.98 $\pm$ 0.06                                                                   | <0.001             |       |
| Treatment         | Incidence of nicotine-induced presynaptic facilitation $\pm$ SEM (%) <sup>3</sup> | $\chi^2$           | $P^4$ |
| Untreated Control | n = 13/19; 68.42 $\pm$ 6.79                                                       | -                  | -     |
| NTC shRNA         | n = 11/15; 73.33 $\pm$ 12.47                                                      | 0.097              | 0.755 |
| MEN1 shRNA        | n = 5/17; 29.41 $\pm$ 4.44                                                        | 5.461              | 0.019 |

1. One-way ANOVA, statistical significance ( $P$ ) relative to untreated control
2. Kruskal-Wallis test (2-tailed), statistical significance ( $P$ ) relative to untreated control
3. Nicotine-induced presynaptic facilitation defined by the proportion of neurons exhibiting an increase in mEPSC frequency in response to nicotine application, with a relative mEPSC frequency (post-nicotine/pre-nicotine) of  $\geq 1.00 \pm$  SEM
4. Chi-squared test, statistical significance ( $P$ ) relative to untreated control

Supplementary Table S9. Related to Figure 8. mEPSC values in lentivirus-transduced hippocampal neuron cultures (neuron samples exhibiting nicotine-induced presynaptic facilitation only).

| Treatment         | 10 $\mu$ M Nicotine | Mean Amplitude (pA) | SEM (pA) | $P^1$              | $P^2$  | n  |
|-------------------|---------------------|---------------------|----------|--------------------|--------|----|
| Untreated Control | Pre                 | 29.83               | 2.81     | (F=0.857; P=0.516) | 0.800  | 13 |
|                   | Post                | 30.49               | 3.23     |                    |        |    |
| NTC shRNA         | Pre                 | 37.82               | 3.60     | 0.543              | 0.130  | 11 |
|                   | Post                | 34.99               | 3.36     | 0.882              |        |    |
| MEN1 shRNA        | Pre                 | 36.28               | 5.70     | 0.893              | 0.275  | 5  |
|                   | Post                | 34.73               | 6.05     | 0.965              |        |    |
| Treatment         | 10 $\mu$ M Nicotine | Mean Frequency (Hz) | SEM (Hz) | $P$                | $P$    | n  |
| Untreated Control | Pre                 | 3.20                | 0.59     | (F=1.616; P=0.172) | <0.001 | 13 |
|                   | Post                | 4.99                | 0.78     |                    |        |    |
| NTC shRNA         | Pre                 | 3.37                | 0.54     | 1.000              | <0.001 | 11 |
|                   | Post                | 4.99                | 0.62     | 0.383              |        |    |
| MEN1 shRNA        | Pre                 | 3.08                | 0.70     | 1.000              | 0.130  | 5  |
|                   | Post                | 4.14                | 1.16     | 0.967              |        |    |

1. One-way ANOVA, statistical significance relative to untreated control, pre-nicotine
2. Paired samples t-test (2-tailed)

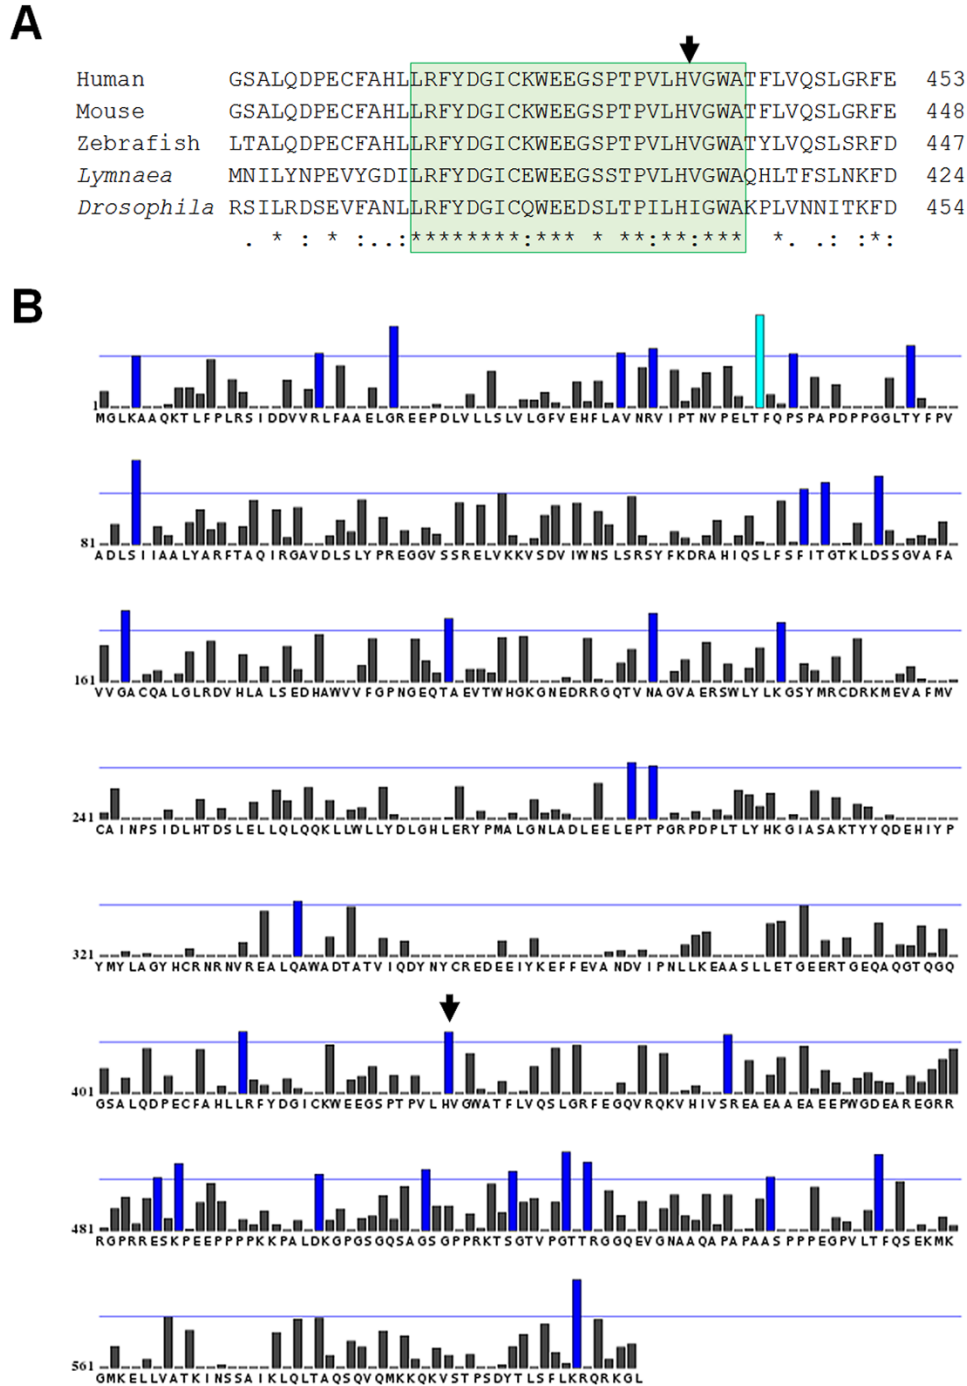

Supplementary Figure S1. Related to Figure 1. The conserved menin ROI and calpain cleavage site.

(A). Sequence alignment of the conserved ROI of menin (shaded green) from vertebrate species human, mouse and zebrafish, and invertebrate species *Lymnaea* and *Drosophila*. Arrow indicates an evolutionarily conserved calpain protease consensus sequence. (B). Multiple kernel learning prediction<sup>2</sup> identifies the presumptive calpain cleavage site in the conserved ROI of mouse menin (arrow). Blue line indicates threshold for significant prediction scores, blue bars indicates predicted calpain cleavage sites.



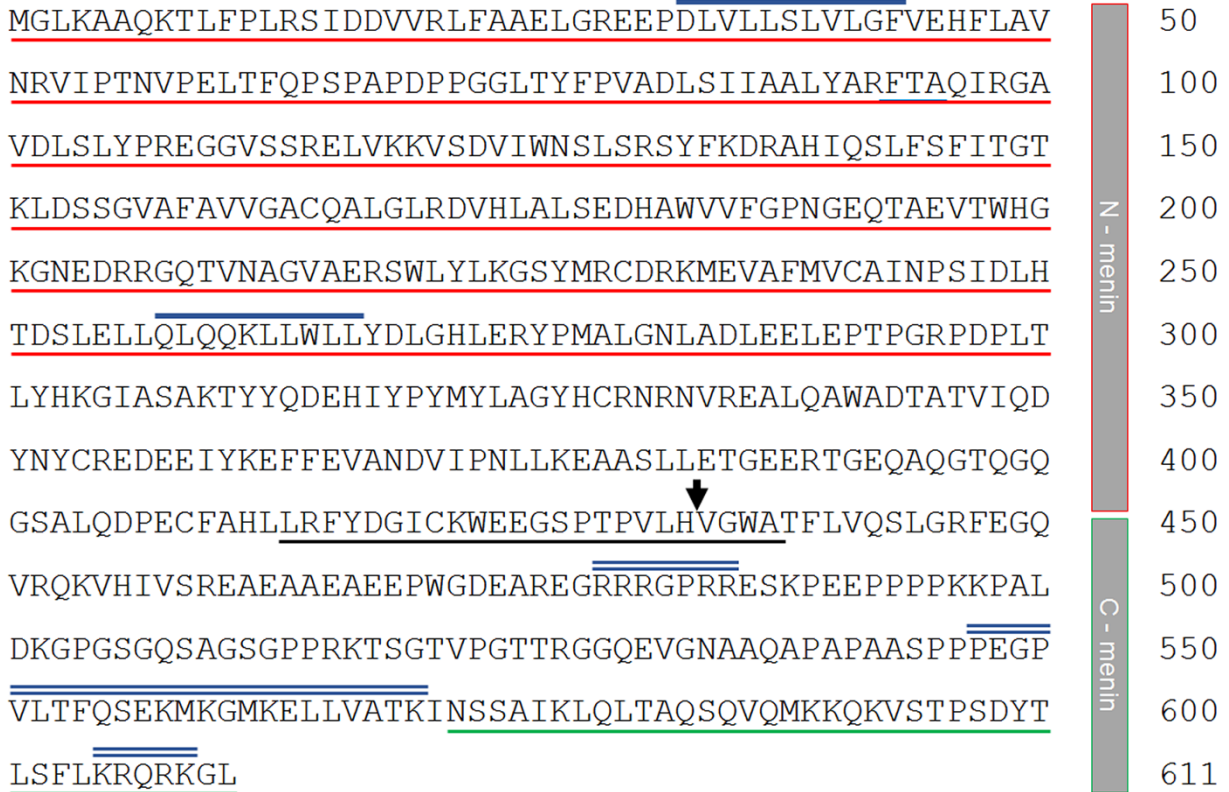

Supplementary Figure S2. Related to Figure 1. The N- and C-terminal epitopes recognized by menin antibodies.

Mouse menin sequence (accession no. AF016398.1). The N-terminal epitope recognized by the menin (N) antibody is underlined in red. The C-terminal epitope recognized by the menin (C) antibody is underlined in green. The conserved ROI is underlined in black, and the calpain cleavage site is indicated with an arrow. Locations of nuclear localization signals (blue, double bar) and nuclear exit signals (blue, single bar) are also shown.

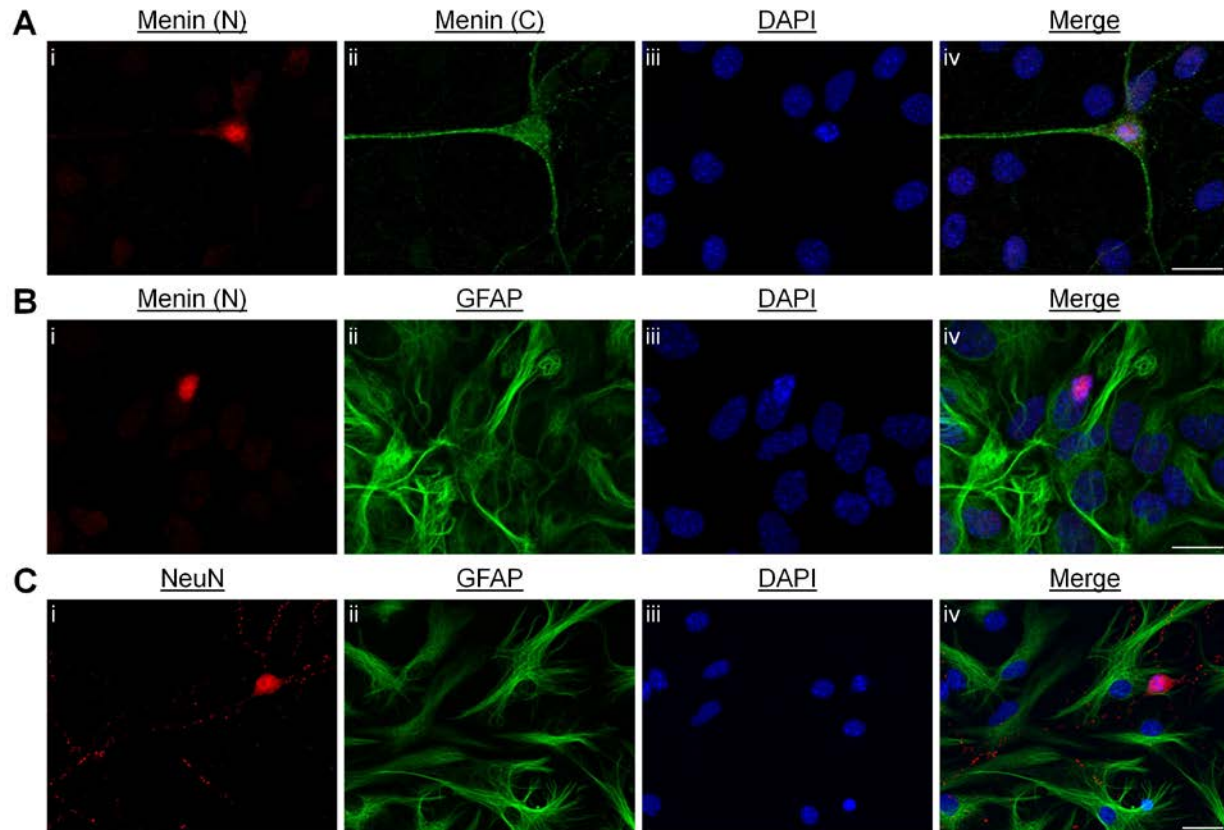

Supplementary Figure S3. Related to Figures 1-2. Menin exhibits neuron-specific expression in hippocampal cultures.

(A-C). ICC localization of menin and cell-type markers in hippocampal cultures at DIV 14 (representative images). (A). Cells labeled with N-terminal (i) and C-terminal (ii) epitope menin antibodies, and the nuclear stain DAPI (iii), (iv) shows merged channels (n=13 images, 4 independent samples). (B). Cells labeled with N-terminal menin (i) and GFAP (ii; glial marker) antibodies, and the nuclear stain DAPI (iii), (iv) shows merged channels (n=9 images, 3 independent samples). (C). Cells labeled with NeuN (i; neuronal marker) and GFAP (ii) antibodies, and the nuclear stain DAPI (iii), (iv) shows merged channels (n=7 images, 3 independent samples).  $\alpha$ -menin signals were absent in glia. Scale bars, 20  $\mu$ m.

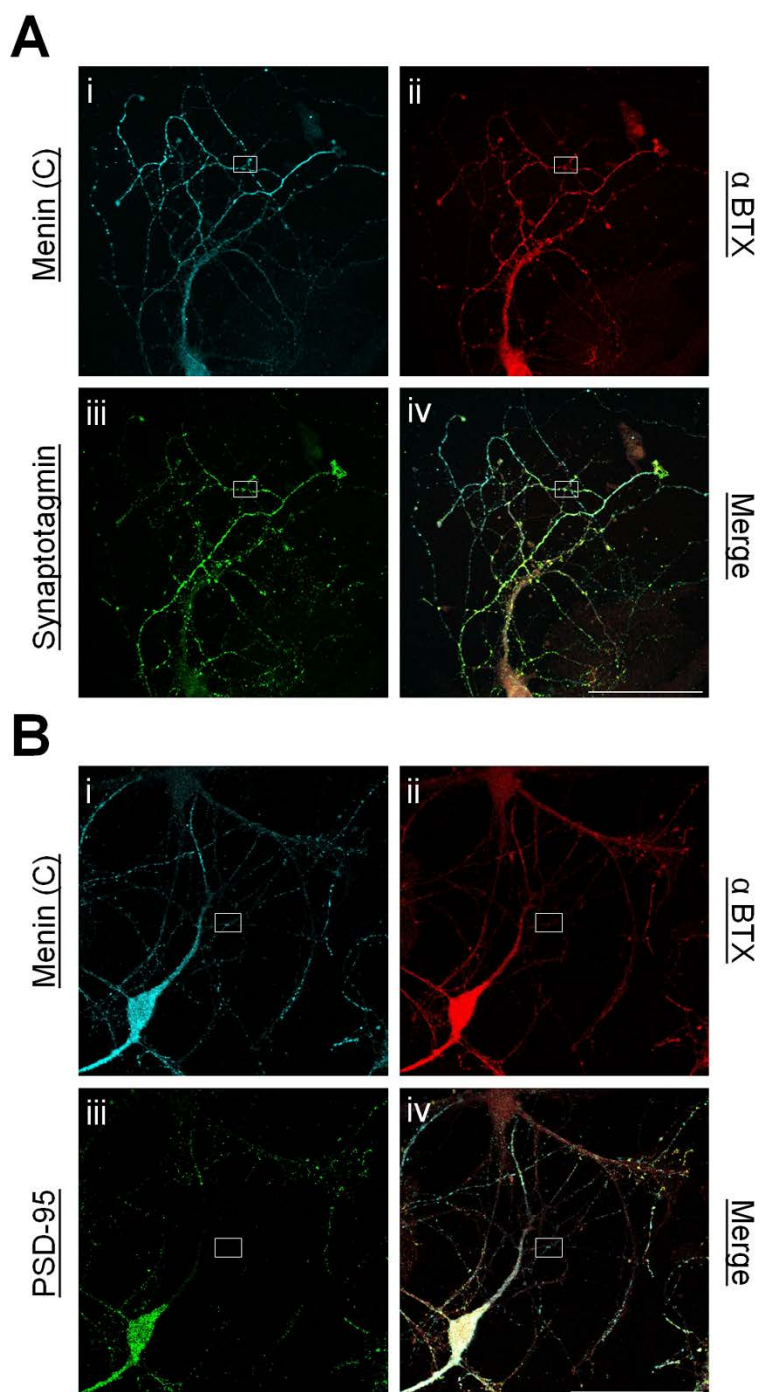

Supplementary Figure S4. Related to Figure 3. Field of view images for super-resolution microscopy.

(A). Mouse hippocampal neurons at DIV 7 labeled with  $\alpha$ -BTX to detect  $\alpha 7$  subunit-containing nAChR (i), a C-terminal epitope menin antibody (ii), and a synaptotagmin antibody to detect presynaptic sites (iii), (iv) shows merged channels. Boxed area is the synaptic ROI depicted with the super resolution image in Fig. 3A. (B). As in A, only labeled with a PSD-95 antibody to detect postsynaptic sites (iii). Boxed area is the synaptic ROI depicted in the super resolution image in Fig. 3B. Scale bars, 50  $\mu$ m.

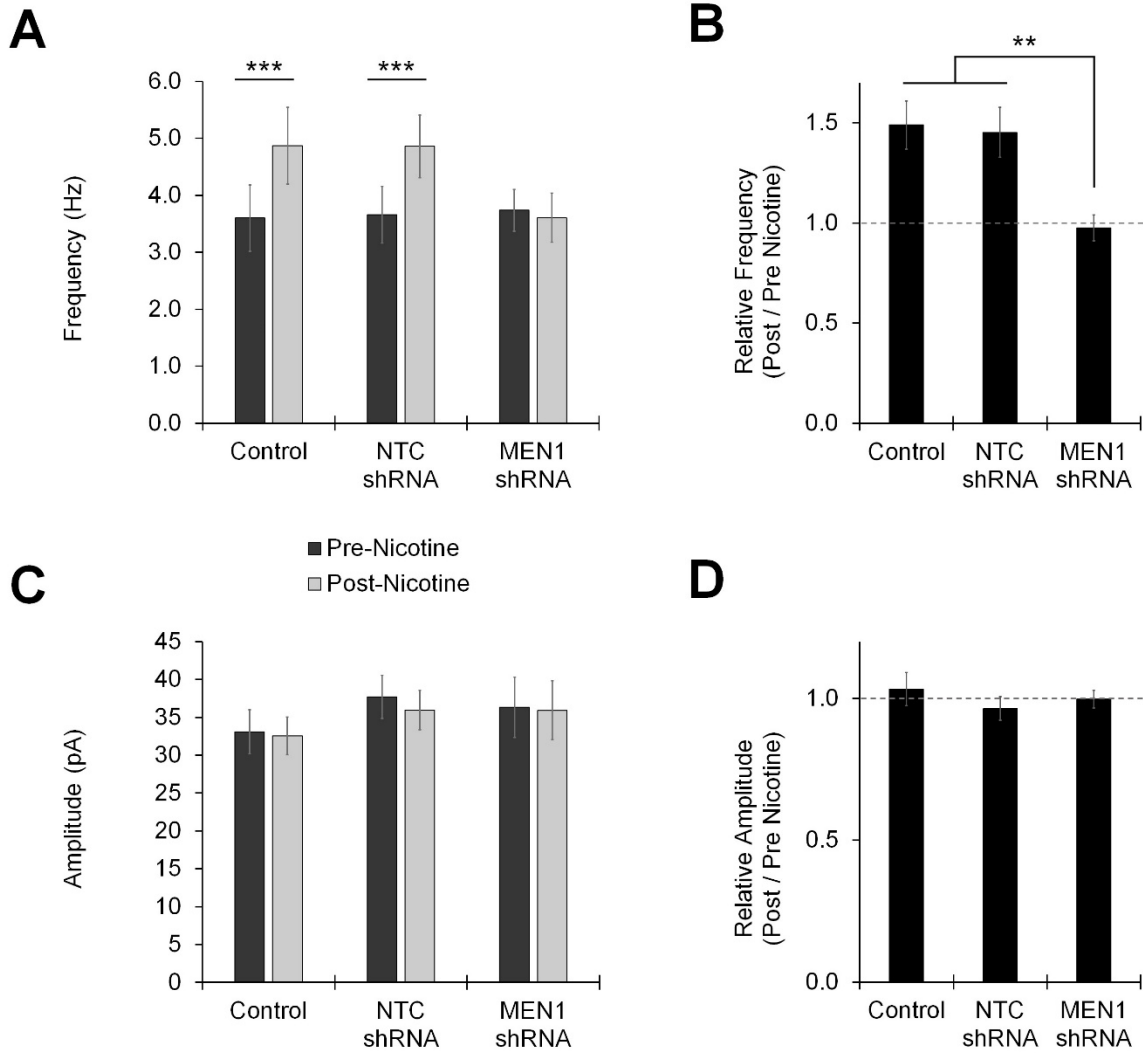

Supplementary Figure S5. Related to Tables S7-S8 and Figure 8. mEPSC values in lentivirus-transduced hippocampal neuron cultures (all neuron samples).

(A). Summary data, mean frequency of mEPSCs, before (Pre) and after (Post) the nicotine pulse recorded from neurons in untreated control (n=19), NTC shRNA (n=15; GFP+), and *MEN1* shRNA (n=17; GFP+) transduced cultures. \*\*\*, statistical significance (paired t-test),  $P < 0.001$ . (B). Relative mEPSC frequency. \*\*, statistical significance (Kruskal-Wallis test),  $P \leq 0.001$ . (C). Summary data, mean amplitude of mEPSCs before (Pre) and after (Post) the nicotine pulse, as in (A). (D). Relative mEPSC amplitude. Dashed line represents a 1:1 ratio indicating no change.

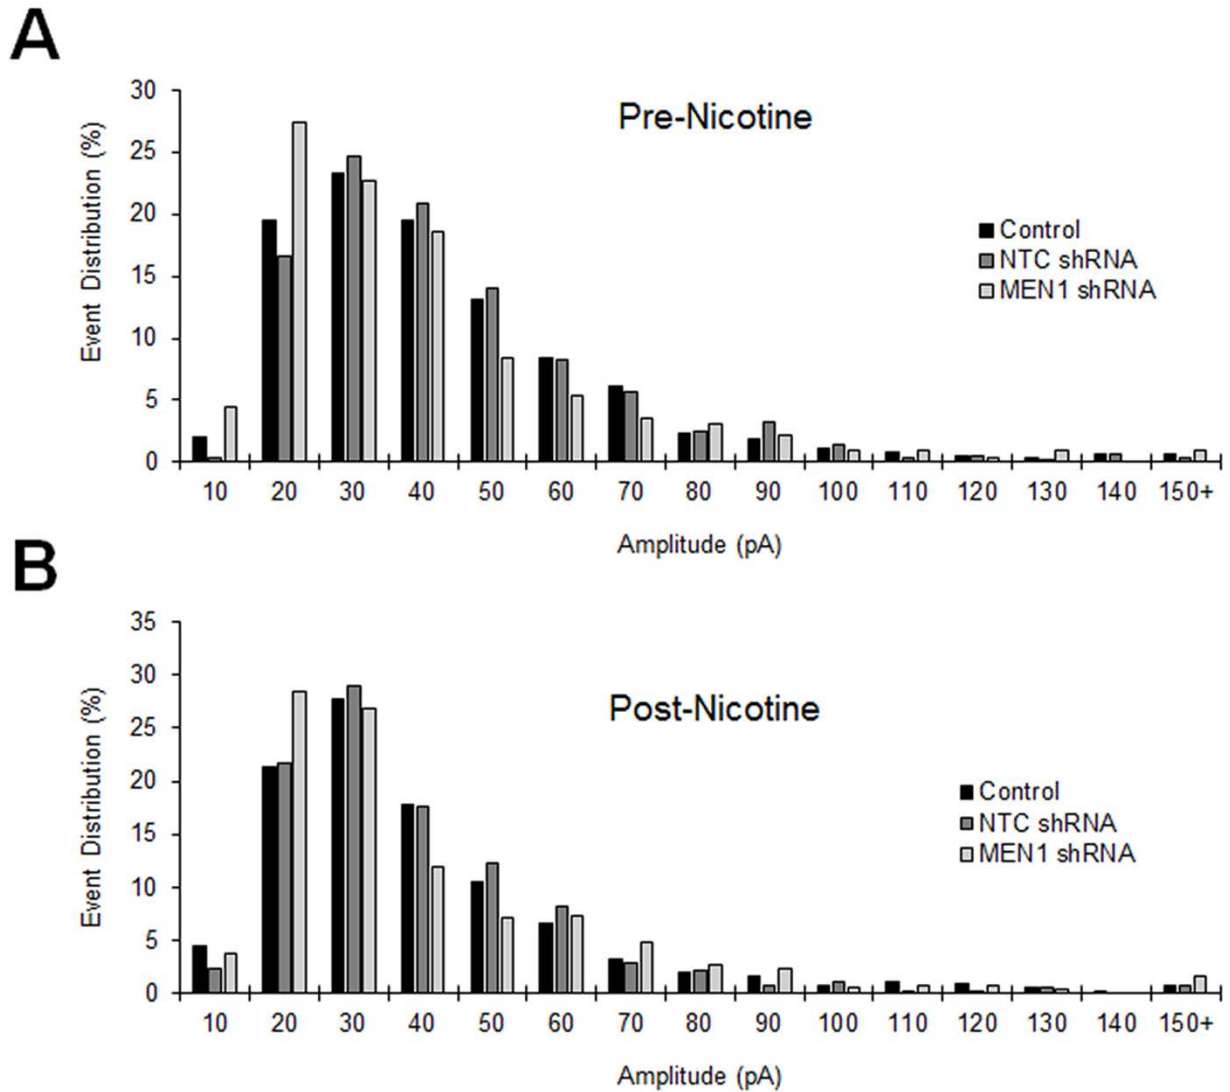

Supplementary Figure S6. Related to Figure S5 and Figure 8. Histogram of mEPSC amplitude distribution (all neuron samples).

Amplitude histogram, patch clamp recordings were made from mouse hippocampal neurons before (**A**) and after (**B**) the application of nicotine. Amplitudes of mEPSCs were binned in 10 pA increments, and are represented here as a percentage of the total number of spontaneous synaptic events that occurred during the 10s period analyzed before and after the application of nicotine.

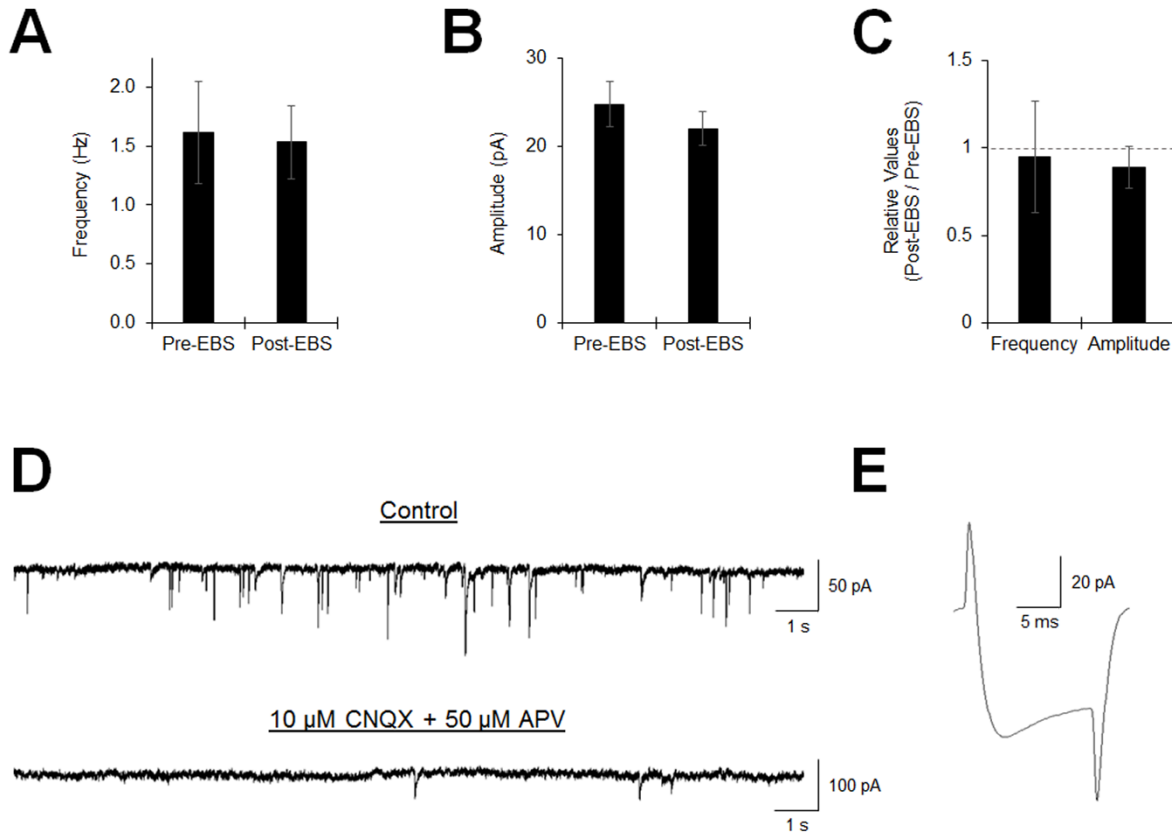

Supplementary Figure S7. Related to Figure 8. Control experiments for patch clamp recordings.

(A-C). Application of vehicle control (n=6; external recording solution [EBS], 250 ms pulse, 10 PSI) did not induce facilitation of mEPSC frequency (A; paired t-test,  $P=0.752$ ) or amplitude (B; paired t-test,  $P=0.145$ ). (C). Relative mEPSC frequency and amplitude. (D) mEPSCs were inhibited by glutamate receptor antagonists (n=4; 10  $\mu$ M 6-cyano-7-nitroquinoxaline-2,3-dione [CNQX] + 50  $\mu$ M DL-2-amino-5-phosphonovaleric acid [APV]), demonstrating that mEPSCs depict the vesicular release of glutamate. (E). No autaptic synaptic currents were observed after a depolarization step (n=6; -100 mV to +30 mV), indicating that mEPSCs represent interneuronal synaptic transmission.

**SUPPLEMENTARY EXPERIMENTAL PROCEDURES**

Supplementary Table S10. Li-Cor Odyssey infra-red imager settings.

| Li-Cor                                           | Intensity | Gain | Volts   | Current |
|--------------------------------------------------|-----------|------|---------|---------|
| Channel 700 (NEB Pre-stained protein marker)     | 4         | 1    | 155.03  | 55.3    |
| Channel 800 (IRDye-800 CW conjugated antibodies) | 5         | 1    | 161.172 | 31.5    |

Supplementary Table S11. qPCR gene specific primers (intron spanning).

| Target           | Accession Number | 5' Sequence                  | 3' Sequence                | Efficiency (%) |
|------------------|------------------|------------------------------|----------------------------|----------------|
| $\beta$ Tubulin  | NM_023279        | AGTCAGCATGAGGGAGA<br>TCG     | TGCAGGTCTGAGTCCCCT<br>AC   | 99.42          |
| $\beta$ Actin    | NM_007393        | ACTGTTCGAGTCGCGTCCA          | GCAGCGATATCGTCATCC<br>AT   | 101.44         |
| <i>MEN1</i>      | NM_008583        | TCCAGTCCCTCTTCAGCT<br>TC     | CCAGATGGACATCTCTGA<br>GACC | 96.44          |
| nAChR $\alpha$ 2 | NM_144803        | TGAGAAGAATCAAATGA<br>TGACCAC | GGAGGTGATGTTGCCAA<br>AC    | 91.72          |
| nAChR $\alpha$ 3 | NM_145129        | TCAAAGAAGCCATCCAA<br>AGTG    | CACCATGGCAACATACTT<br>CC   | 85.10          |
| nAChR $\alpha$ 4 | NM_015730        | CGGCCAGTAGCCAATATC<br>TC     | AGTCATGCCACTCCTGCT<br>TC   | 90.92          |
| nAChR $\alpha$ 5 | NM_176844        | TCTGGTTGAAGCAGGAAT<br>GG     | GGATCCACAGAGAGTCT<br>GAAGG | 89.37          |
| nAChR $\alpha$ 6 | NM_021369        | GTGGAGAATGTCTCCGAT<br>CC     | CAGCCACAGATTGGTCTC<br>C    | 103.38         |
| nAChR $\alpha$ 7 | NM_007390        | CCTCTCAGTGGTCGTGAC<br>AG     | AACCATGCACACCAATTC<br>AG   | 99.83          |
| nAChR $\beta$ 2  | NM_009602        | ACTCTATGGCGCTGCTGT<br>TC     | GGATCCAAGAGATGCTCC<br>AC   | 96.71          |
| nAChR $\beta$ 3  | NM_173212        | CCCTGTGTTGAATTCCAG<br>TG     | GGATTCCATCGTAATTTT<br>TGG  | 91.00          |
| nAChR $\beta$ 4  | NM_148944        | AGCTCCTCCCAGCTCATC<br>TC     | AGCCAGATGCTGGTGGTC         | 87.76          |
| GluR1            | NM_008165        | ACACAAAGGCCTGGAAT<br>GG      | ATGGCTTGGAGAAGTCG<br>ATG   | 98.13          |
| NR2A             | NM_008170        | TCATGATCCAGGAGGAGT<br>TTG    | ATCGGAAAGGCGGAGAA<br>TAG   | 95.35          |
| SYP              | NM_009305        | GAGGGACCCTGTGACTTC<br>AG     | AGCCTGTCTCCTTGAACA<br>CG   | 92.11          |

Supplementary Table S12. Nikon A1R MP and C2 confocal fluorescent microscope settings.

| Fluorescent microscope settings for data presented in: | Nikon A1R MP - Laser Wavelength | Laser Power | PMT HV |
|--------------------------------------------------------|---------------------------------|-------------|--------|
| Fig. 1                                                 | 402.7                           | 2.6         | 90     |
|                                                        | 488.0                           | 7.8         | 104    |
|                                                        | 561.7                           | 10.0        | 103    |
| Fig. 2                                                 | 402.7                           | 3.8         | 100    |
|                                                        | 488.0                           | 7.8         | 95     |
|                                                        | 561.7                           | 10.0        | 81     |
|                                                        | 639.9                           | 9.5         | 98     |
| Fig. 5                                                 | 402.7                           | 2.6         | 90     |
|                                                        | 488.0                           | 7.8         | 68     |
|                                                        | 561.7                           | 10          | 107    |
|                                                        | 639.9                           | 9.5         | 104    |
| Fig. 6Ai-v                                             | 402.7                           | 2.6         | 90     |
|                                                        | 488.0                           | 7.8         | 65     |
|                                                        | 561.7                           | 10.0        | 104    |
|                                                        | 639.9                           | 9.5         | 104    |
| Fig. 6Bi-ii                                            | 402.7                           | 3.8         | 100    |
|                                                        | 488.0                           | 7.8         | 95     |
|                                                        | 639.9                           | 9.5         | 98     |
| Fig. 6Biv-v                                            | 402.7                           | 7.2         | 95     |
|                                                        | 561.7                           | 10.0        | 100    |
|                                                        | 639.9                           | 9.5         | 80     |
| Fluorescent microscope settings for data presented in: | Nikon C2 - Laser Wavelength     | Laser Power | PMT HV |
| Fig. 3                                                 | 488.0                           | 10.0        | 90     |
|                                                        | 561.0                           | 20.0        | 90     |
|                                                        | 640.0                           | 20.0        | 90     |
| Fig. 7                                                 | 488.0                           | 1.0         | 85     |
|                                                        | 561.0                           | 5.0         | 90     |
|                                                        | 640.0                           | 5.0         | 90     |

### **SUPPLEMENTARY REFERENCES**

- 1 Pfaffl, M. W., Horgan, G. W. & Dempfle, L. Relative expression software tool (REST) for group-wise comparison and statistical analysis of relative expression results in real-time PCR. *Nucleic acids research* **30**, e36 (2002).
- 2 DuVerle, D. A., Ono, Y., Sorimachi, H. & Mamitsuka, H. Calpain cleavage prediction using multiple kernel learning. *PloS one* **6**, e19035, doi:10.1371/journal.pone.0019035 (2011).
